# Supplementary material
Source: PubMed Central journal article supplement (PMC6537847)
Supplement: jama-321-1906-s001.pdf [file jama-321-1906-s001.pdf]

## Supplementary Online Content

Garcia E, Berhane KT, Islam T, et al. Association of changes in air quality with incident asthma in children in California, 1993-2014. *JAMA*. doi:10.1001/jama.2019.5357

### **eMethods.** Data Analysis

**eTable 1.** Distribution of Selected Characteristics Among Participants Included and Excluded From the Current Study of the Children's Health Study, 1993-2014

**eTable 2.** *P* Values for Evidence of Effect Modification of the Asthma Incidence and Air Pollution Association Based on Partial Likelihood Ratio Tests for Interaction Terms With Pollutant and Potential Effect Modifier in the Children's Health Study, 1993-2014

**eTable 3.** Results of Sensitivity Analyses for Incidence Rate Ratios (IRR) Associated With Reduction in Nitrogen Dioxide (NO<sub>2</sub>) and Particulate Matter <2.5 μm (PM<sub>2.5</sub>) in the Children's Health Study, 1993-2014

**eTable 4.** Results of Sensitivity Analyses Using Cox Proportional Hazards Models for Ozone (O<sub>3</sub>), Nitrogen Dioxide (NO<sub>2</sub>), Particulate Matter <10 μm (PM<sub>10</sub>) and <2.5 μm (PM<sub>2.5</sub>) in the Children's Health Study, 1993-2014

### **eReferences**

This supplementary material has been provided by the authors to give readers additional information about their work.

## eMethods. Data Analysis

### Modeling Approach

The multilevel modeling approach used in this study has been previously described.<sup>1-3</sup> In this study a multilevel Poisson regression with a random effect was specifically used for the main analysis of associations between air pollution exposure and incident asthma. The model was fitted to ungrouped person-time data.<sup>4</sup> In “Poisson regression analysis of ungrouped data” by Loomis *et al.* each observation represented one person-year, thus all observations contributed equal weight and an offset term did not need to be specified. In contrast, in the current analysis all person-time for a given participant were combined into a single observation and an offset term for follow-up time was used to represent time at risk. In this two-level Poisson model  $t$ ,  $c$ , and  $i$  denote community, cohort, and participant, respectively. In the first level we modeled participant-specific rate of asthma incidence ( $\mu_{tci}$ ) as a function of participant-specific covariates  $Z_{tci}$  (e.g., baseline age, sex, race, ethnicity, etc.) and an offset for participant-specific follow-up time  $F_{tci}$  [Eq. 1]. Here,  $A_{tc}$  represents community and cohort-specific rates of asthma, which were used in the second-level model.

$$\text{Log } \mu_{tci} = \log F_{tci} + A_{tc} + \gamma_1 Z_{tci} \quad [\text{Equation 1}]$$

In the second level, community and cohort-specific adjusted rates of asthma ( $A_{tc}$ ) from level 1 were regressed as functions of community and cohort-specific mean annual air pollution concentration ( $X_{tc}$ ) and community-cohort level error ( $e_{tc}$ ), [Eq. 2]. Community indicators (*Community*) were also included in the second-level model as adjustments to focus health point estimates on secular changes in air pollutions within-community rather than across communities.

$$A_{tc} = \alpha + \beta_1 X_{tc} + \gamma_2 \text{Community} + e_{tc} \quad [\text{Equation 2}]$$

These two regression models were combined to yield a more efficient mixed-effects model [Eq. 3].

$$\text{Log } \mu_{tci} = \log F_{tci} + \alpha + \beta_1 X_{tc} + \gamma_1 Z_{tci} + \gamma_2 \text{Community} + e_{tc} \quad [\text{Equation 3}]$$

The main parameter of interest in the above Poisson model is the within-community across-cohorts parameter coefficient of improvements in air pollution on asthma incidence rates,  $\beta_1$ . Models were fitted using SAS procedure GLIMMIX, specifying “dist=poisson” for Poisson distribution and including an offset for person-time (natural log-transformed).

**eTable 1. Distribution of Selected Characteristics Among Participants Included and Excluded From the Current Study of the Children's Health Study, 1993-2014**

| Characteristic                       | All Participants, N (%) |                                                |                                                      | Cohort Follow-up Period, N (%) |                                                |            |                                                |             |                                                |                                                      |
|--------------------------------------|-------------------------|------------------------------------------------|------------------------------------------------------|--------------------------------|------------------------------------------------|------------|------------------------------------------------|-------------|------------------------------------------------|------------------------------------------------------|
|                                      |                         |                                                |                                                      | 1993-2001                      |                                                | 1996-2004  |                                                | 2006-2014   |                                                |                                                      |
|                                      | Included                | Excluded due to missing baseline asthma status | Excluded due to missing years 3 and 4 questionnaires | Included                       | Excluded due to missing baseline asthma status | Included   | Excluded due to missing baseline asthma status | Included    | Excluded due to missing baseline asthma status | Excluded due to missing years 3 and 4 questionnaires |
| Participants                         | 4140                    | 143                                            | 268                                                  | 1093                           | 29                                             | 1170       | 39                                             | 1877        | 75                                             | 268                                                  |
| Person-years of follow-up            | 24254                   | 664                                            | -                                                    | 6201                           | 132                                            | 6842       | 188                                            | 11211       | 343                                            | -                                                    |
| Age at baseline, mean (SD), years    | 9.5 (0.6)               | 9.5 (0.7)                                      | -                                                    | 9.9 (0.5)                      | 10.1 (0.6)                                     | 9.5 (0.4)  | 9.6 (0.4)                                      | 9.3 (0.7)   | 9.2 (0.8)                                      | -                                                    |
| Sex                                  |                         |                                                |                                                      |                                |                                                |            |                                                |             |                                                |                                                      |
| <i>Female</i>                        | 2179 (52.6)             | 75 (52.5)                                      | 109 (40.7)                                           | 569 (52.1)                     | 16 (55.2)                                      | 606 (51.8) | 22 (56.4)                                      | 1004 (53.5) | 37 (49.3)                                      | 109 (40.7)                                           |
| <i>Male</i>                          | 1961 (47.4)             | 68 (47.5)                                      | 159 (59.3)                                           | 524 (47.9)                     | 13 (44.8)                                      | 564 (48.2) | 17 (43.6)                                      | 873 (46.5)  | 38 (50.7)                                      | 159 (59.3)                                           |
| Ethnicity                            |                         |                                                |                                                      |                                |                                                |            |                                                |             |                                                |                                                      |
| <i>Hispanic</i>                      | 1686 (40.7)             | 53 (37.1)                                      | 159 (59.3)                                           | 307 (28.1)                     | 12 (41.4)                                      | 413 (35.3) | 16 (41.0)                                      | 966 (51.5)  | 25 (33.3)                                      | 159 (59.3)                                           |
| <i>Non-Hispanic</i>                  | 2310 (55.8)             | 75 (52.4)                                      | 85 (31.7)                                            | 776 (71.0)                     | 14 (48.3)                                      | 750 (64.1) | 19 (48.7)                                      | 784 (41.8)  | 42 (56.0)                                      | 85 (31.7)                                            |
| <i>Missing</i>                       | 144 (3.5)               | 15 (10.5)                                      | 24 (9.0)                                             | 10 (0.9)                       | 3 (10.3)                                       | 7 (0.6)    | 4 (10.3)                                       | 127 (6.8)   | 8 (10.7)                                       | 24 (9.0)                                             |
| Race                                 |                         |                                                |                                                      |                                |                                                |            |                                                |             |                                                |                                                      |
| <i>Asian/Pacific Islander</i>        | 178 (4.3)               | 11 (7.7)                                       | 8 (3.0)                                              | 60 (5.5)                       | 3 (10.3)                                       | 56 (4.8)   | 3 (7.7)                                        | 62 (3.3)    | 5 (6.7)                                        | 8 (3.0)                                              |
| <i>Black</i>                         | 145 (3.5)               | 7 (4.9)                                        | 11 (4.1)                                             | 50 (4.6)                       | 3 (10.3)                                       | 54 (4.7)   | 2 (5.1)                                        | 41 (2.2)    | 2 (2.7)                                        | 11 (4.1)                                             |
| <i>Native American Indian/Other</i>  | 890 (21.5)              | 30 (20.1)                                      | 67 (25.0)                                            | 182 (16.7)                     | 7 (24.1)                                       | 249 (21.3) | 9 (23.1)                                       | 459 (24.5)  | 14 (18.7)                                      | 67 (25.0)                                            |
| <i>White</i>                         | 2273 (54.9)             | 58 (40.6)                                      | 92 (34.3)                                            | 704 (64.4)                     | 9 (31.0)                                       | 692 (59.2) | 15 (38.5)                                      | 877 (46.7)  | 34 (45.3)                                      | 92 (34.3)                                            |
| <i>Mixed</i>                         | 392 (9.5)               | 20 (14.0)                                      | 27 (10.1)                                            | 76 (7.0)                       | 1 (3.5)                                        | 106 (9.1)  | 7 (18.0)                                       | 210 (11.2)  | 12 (16.0)                                      | 27 (10.1)                                            |
| <i>Missing</i>                       | 262 (6.3)               | 17 (11.9)                                      | 63 (23.5)                                            | 21 (1.9)                       | 6 (20.7)                                       | 13 (1.1)   | 3 (7.7)                                        | 228 (12.2)  | 8 (10.7)                                       | 63 (23.5)                                            |
| Parental education                   |                         |                                                |                                                      |                                |                                                |            |                                                |             |                                                |                                                      |
| <i>High school graduate or below</i> | 1424 (34.4)             | 51 (35.7)                                      | 114 (42.5)                                           | 379 (34.7)                     | 8 (27.6)                                       | 385 (32.9) | 14 (35.9)                                      | 660 (35.2)  | 29 (38.7)                                      | 114 (42.5)                                           |
| <i>Some college or above</i>         | 2476 (59.8)             | 52 (36.4)                                      | 118 (44.0)                                           | 689 (63.0)                     | 8 (27.6)                                       | 728 (62.2) | 9 (23.1)                                       | 1059 (56.4) | 35 (46.7)                                      | 118 (44.0)                                           |
| <i>Missing</i>                       | 240 (5.8)               | 40 (28.0)                                      | 36 (13.4)                                            | 25 (2.3)                       | 13 (44.8)                                      | 57 (4.9)   | 16 (41.0)                                      | 158 (8.4)   | 11 (14.7)                                      | 36 (13.4)                                            |

Table continues on next page

**eTable 1 (continued). Distribution of Selected Characteristics Among Participants Included and Excluded From the Current Study of the Children's Health Study, 1993-2014**

| Characteristic               | All Participants, N (%) |                                                |                                                      | Cohort Follow-up Period, N (%) |                                                |             |                                                |             |                                                |                                                      |
|------------------------------|-------------------------|------------------------------------------------|------------------------------------------------------|--------------------------------|------------------------------------------------|-------------|------------------------------------------------|-------------|------------------------------------------------|------------------------------------------------------|
|                              | Included                | Excluded due to missing baseline asthma status | Excluded due to missing years 3 and 4 questionnaires | 1993-2001                      |                                                | 1996-2004   |                                                | 2006-2014   |                                                |                                                      |
|                              |                         |                                                |                                                      | Included                       | Excluded due to missing baseline asthma status | Included    | Excluded due to missing baseline asthma status | Included    | Excluded due to missing baseline asthma status | Excluded due to missing years 3 and 4 questionnaires |
| Gas stove in home            |                         |                                                |                                                      |                                |                                                |             |                                                |             |                                                |                                                      |
| <i>No</i>                    | 784 (18.9)              | 17 (11.9)                                      | 42 (15.7)                                            | 243 (22.2)                     | 2 (6.9)                                        | 287 (24.5)  | 5 (12.8)                                       | 254 (13.5)  | 10 (13.3)                                      | 42 (15.7)                                            |
| <i>Yes</i>                   | 3153 (76.2)             | 92 (64.3)                                      | 194 (72.4)                                           | 824 (75.4)                     | 14 (48.3)                                      | 860 (73.5)  | 20 (51.3)                                      | 1469 (78.3) | 58 (77.3)                                      | 194 (72.4)                                           |
| <i>Missing</i>               | 203 (4.9)               | 34 (23.8)                                      | 32 (11.9)                                            | 26 (2.4)                       | 13 (44.8)                                      | 23 (2.0)    | 14 (35.9)                                      | 154 (8.2)   | 7 (9.3)                                        | 32 (11.9)                                            |
| Play team sport              |                         |                                                |                                                      |                                |                                                |             |                                                |             |                                                |                                                      |
| <i>No</i>                    | 1938 (46.8)             | 56 (39.2)                                      | -                                                    | 532 (48.7)                     | 7 (24.1)                                       | 539 (46.1)  | 16 (41.0)                                      | 867 (46.2)  | 33 (44.0)                                      | -                                                    |
| <i>Yes</i>                   | 2104 (50.8)             | 56 (39.2)                                      | -                                                    | 542 (49.6)                     | 9 (31.0)                                       | 597 (51.0)  | 9 (23.1)                                       | 965 (51.4)  | 38 (50.7)                                      | -                                                    |
| <i>Missing</i>               | 98 (2.3)                | 31 (21.7)                                      | -                                                    | 19 (1.7)                       | 13 (44.8)                                      | 34 (2.9)    | 14 (35.9)                                      | 45 (2.4)    | 4 (5.3)                                        | -                                                    |
| In utero exposure to smoking |                         |                                                |                                                      |                                |                                                |             |                                                |             |                                                |                                                      |
| <i>No</i>                    | 3455 (83.5)             | 87 (60.8)                                      | 215 (80.2)                                           | 876 (80.2)                     | 11 (37.9)                                      | 966 (82.6)  | 20 (51.3)                                      | 1613 (85.9) | 56 (74.7)                                      | 215 (80.2)                                           |
| <i>Yes</i>                   | 484 (11.7)              | 15 (10.5)                                      | 23 (8.6)                                             | 187 (17.1)                     | 5 (17.2)                                       | 177 (15.1)  | 4 (10.3)                                       | 120 (6.4)   | 6 (8.0)                                        | 23 (8.6)                                             |
| <i>Missing</i>               | 201 (4.9)               | 41 (28.7)                                      | 30 (11.2)                                            | 30 (2.7)                       | 13 (44.8)                                      | 27 (2.3)    | 15 (38.5)                                      | 144 (7.7)   | 13 (17.3)                                      | 30 (11.2)                                            |
| Secondhand smoke exposure    |                         |                                                |                                                      |                                |                                                |             |                                                |             |                                                |                                                      |
| <i>No</i>                    | 3006 (72.6)             | 74 (51.7)                                      | 181 (67.5)                                           | 757 (69.3)                     | 8 (27.6)                                       | 808 (69.1)  | 16 (41.0)                                      | 1441 (76.8) | 50 (66.7)                                      | 181 (67.5)                                           |
| <i>Yes</i>                   | 874 (21.1)              | 29 (20.3)                                      | 54 (20.2)                                            | 302 (27.6)                     | 9 (31.0)                                       | 308 (26.3)  | 6 (15.4)                                       | 264 (14.1)  | 14 (18.7)                                      | 54 (20.2)                                            |
| <i>Missing</i>               | 260 (6.3)               | 40 (28.0)                                      | 33 (12.3)                                            | 34 (3.1)                       | 12 (41.4)                                      | 54 (4.6)    | 17 (43.6)                                      | 172 (9.2)   | 11 (14.7)                                      | 33 (12.3)                                            |
| Parental history of asthma   |                         |                                                |                                                      |                                |                                                |             |                                                |             |                                                |                                                      |
| <i>No</i>                    | 3235 (78.2)             | 87 (60.8)                                      | 159 (59.3)                                           | 852 (78.0)                     | 10 (34.5)                                      | 912 (78.0)  | 19 (48.7)                                      | 1471 (78.4) | 58 (77.3)                                      | 159 (59.3)                                           |
| <i>Yes</i>                   | 687 (16.6)              | 14 (9.8)                                       | 53 (19.8)                                            | 175 (16.0)                     | 2 (6.9)                                        | 172 (14.7)  | 1 (2.6)                                        | 340 (18.1)  | 11 (14.7)                                      | 53 (19.8)                                            |
| <i>Missing</i>               | 218 (5.3)               | 42 (29.4)                                      | 56 (20.9)                                            | 66 (6.0)                       | 17 (58.6)                                      | 86 (7.3)    | 19 (48.7)                                      | 66 (3.5)    | 6 (8.0)                                        | 56 (20.9)                                            |
| Spanish questionnaire        |                         |                                                |                                                      |                                |                                                |             |                                                |             |                                                |                                                      |
| <i>No</i>                    | 3486 (84.2)             | 107 (74.8)                                     | 197 (73.5)                                           | 1014 (92.8)                    | 19 (65.5)                                      | 1012 (86.5) | 29 (74.4)                                      | 1460 (77.8) | 59 (78.7)                                      | 197 (73.5)                                           |
| <i>Yes</i>                   | 654 (15.8)              | 36 (25.2)                                      | 71 (26.5)                                            | 79 (7.2)                       | 10 (34.5)                                      | 158 (13.5)  | 10 (25.6)                                      | 417 (22.2)  | 16 (21.3)                                      | 71 (26.5)                                            |

**eTable 2. P Values for Evidence of Effect Modification of the Asthma Incidence and Air Pollution Association Based on Partial Likelihood Ratio Tests for Interaction Terms With Pollutant and Potential Effect Modifier in the Children's Health Study, 1993-2014**

| Potential Effect Modifier                  | Pollutant       |                   |
|--------------------------------------------|-----------------|-------------------|
|                                            | NO <sub>2</sub> | PM <sub>2.5</sub> |
| Sex                                        | 0.53            | 0.20              |
| Ethnicity                                  | 0.41            | 0.82              |
| Race                                       | 0.46            | 0.22              |
| In utero exposure to smoking               | 0.13            | 0.74              |
| Secondhand smoke exposure                  | 0.62            | 0.13              |
| Parental education                         | 0.60            | 0.87              |
| Parental history of asthma                 | 0.86            | 0.78              |
| Native American ancestry (above/below 50%) | 0.53            | 0.65              |
| High/low 1993 air pollution level          | 0.80            | 0.07              |

**eTable 3. Results of Sensitivity Analyses for Incidence Rate Ratios (IRR) Associated With Reduction in Nitrogen Dioxide (NO<sub>2</sub>) and Particulate Matter <2.5 μm (PM<sub>2.5</sub>) in the Children's Health Study, 1993-2014. Main analysis based on 4140 children, including 525 incident asthma cases**

| Sensitivity Analysis                                                                                                                                                                                                           | N    | N cases | NO <sub>2</sub>   |         | PM <sub>2.5</sub> |         |
|--------------------------------------------------------------------------------------------------------------------------------------------------------------------------------------------------------------------------------|------|---------|-------------------|---------|-------------------|---------|
|                                                                                                                                                                                                                                |      |         | IRR (95% CI)      | P value | IRR (95% CI)      | P value |
| Excluded one town                                                                                                                                                                                                              |      |         |                   |         |                   |         |
| <i>Alpine</i>                                                                                                                                                                                                                  | 3665 | 471     | 0.80 (0.71, 0.90) | <0.001  | 0.80 (0.65, 0.99) | 0.04    |
| <i>Lake Elsinore</i>                                                                                                                                                                                                           | 3724 | 468     | 0.77 (0.68, 0.87) | <0.001  | 0.73 (0.59, 0.90) | 0.004   |
| <i>Lake Gregory</i>                                                                                                                                                                                                            | 3651 | 466     | 0.80 (0.71, 0.91) | <0.001  | 0.84 (0.69, 1.02) | 0.07    |
| <i>Long Beach</i>                                                                                                                                                                                                              | 3731 | 466     | 0.86 (0.75, 0.98) | 0.03    | 0.87 (0.71, 1.06) | 0.16    |
| <i>Mira Loma</i>                                                                                                                                                                                                               | 3645 | 477     | 0.80 (0.71, 0.90) | <0.001  | 0.80 (0.65, 1.00) | 0.05    |
| <i>Riverside</i>                                                                                                                                                                                                               | 3679 | 464     | 0.80 (0.70, 0.90) | <0.001  | 0.71 (0.56, 0.89) | 0.003   |
| <i>San Dimas</i>                                                                                                                                                                                                               | 3715 | 467     | 0.77 (0.67, 0.89) | <0.001  | 0.84 (0.67, 1.04) | 0.12    |
| <i>Santa Maria</i>                                                                                                                                                                                                             | 3650 | 471     | 0.81 (0.72, 0.91) | <0.001  | 0.82 (0.67, 0.99) | 0.04    |
| <i>Upland</i>                                                                                                                                                                                                                  | 3660 | 450     | 0.80 (0.70, 0.91) | 0.001   | 0.84 (0.67, 1.05) | 0.13    |
| Excluded participants reporting wheeze in prior 12 months at baseline                                                                                                                                                          | 3835 | 439     | 0.82 (0.72, 0.93) | 0.002   | 0.80 (0.65, 0.98) | 0.03    |
| Excluded participants reporting 3+ months of cough in prior 12 months at baseline                                                                                                                                              | 3987 | 481     | 0.78 (0.69, 0.88) | <0.001  | 0.80 (0.63, 1.00) | 0.05    |
| Excluded participants reporting either wheeze or 3+ months of cough in prior 12 months at baseline                                                                                                                             | 3723 | 411     | 0.81 (0.71, 0.92) | 0.002   | 0.79 (0.62, 0.99) | 0.04    |
| Excluded first year of follow-up                                                                                                                                                                                               | 3712 | 444     | 0.77 (0.68, 0.88) | <0.001  | 0.81 (0.65, 1.01) | 0.07    |
| Excluded cohort E participants where year 3 survey used as baseline                                                                                                                                                            | 3942 | 501     | 0.81 (0.72, 0.92) | <0.001  | 0.83 (0.67, 1.01) | 0.07    |
| Re-included participants with missing baseline asthma status                                                                                                                                                                   | 4283 | 574     | 0.85 (0.76, 0.95) | 0.004   | 0.88 (0.73, 1.05) | 0.15    |
| Imputed asthma diagnosis date to 6 months after prior questionnaire                                                                                                                                                            | 4140 | 525     | 0.80 (0.71, 0.90) | <0.001  | 0.82 (0.67, 0.99) | 0.04    |
| Restricted to longer follow-up                                                                                                                                                                                                 |      |         |                   |         |                   |         |
| <i>Followed until event or year 7 or later</i>                                                                                                                                                                                 | 2864 | 525     | 0.82 (0.72, 0.92) | <0.001  | 0.81 (0.66, 0.98) | 0.03    |
| <i>Followed until event or year 5 or later</i>                                                                                                                                                                                 | 3439 | 525     | 0.80 (0.71, 0.90) | <0.001  | 0.80 (0.66, 0.98) | 0.03    |
| Adjusted for:                                                                                                                                                                                                                  |      |         |                   |         |                   |         |
| <i>Income, education, and insurance</i>                                                                                                                                                                                        | 4140 | 525     | 0.79 (0.70, 0.89) | <0.001  | 0.80 (0.65, 0.98) | 0.03    |
| <i>Exposure to smoking in utero, and secondhand smoke exposure</i>                                                                                                                                                             | 4140 | 525     | 0.80 (0.71, 0.90) | <0.001  | 0.81 (0.66, 0.98) | 0.03    |
| <i>Pests in home, pets in home, and carpet in child's bedroom</i>                                                                                                                                                              | 4140 | 525     | 0.81 (0.71, 0.91) | <0.001  | 0.82 (0.68, 1.00) | 0.05    |
| <i>Ozone</i>                                                                                                                                                                                                                   | 4140 | 525     | 0.80 (0.70, 0.92) | 0.001   | -                 |         |
| <i>PM<sub>10</sub></i>                                                                                                                                                                                                         | 4140 | 525     | 0.79 (0.69, 0.90) | <0.001  | 0.81 (0.64, 1.01) | 0.07    |
| Omitted random effect for cohort nested within community                                                                                                                                                                       | 4140 | 525     | 0.80 (0.71, 0.90) | <0.001  | 0.81 (0.67, 0.98) | 0.03    |
| Bootstrap at community level instead of random effect                                                                                                                                                                          | 4140 | 525     | 0.80 (0.71, 0.90) | <0.001  | 0.81 (0.66, 0.98) | 0.03    |
| Included a fixed effect for cohort                                                                                                                                                                                             | 4140 | 525     | 0.82 (0.69, 0.97) | 0.02    | 1.39 (0.95, 2.02) | 0.09    |
| Incidence rate ratios (IRR) are per median changes in air pollution concentrations observed among the nine communities between 1993 and 2006 (-4.3 ppb for NO <sub>2</sub> and -8.1 μg/m <sup>3</sup> for PM <sub>2.5</sub> ). |      |         |                   |         |                   |         |
| Models adjusted for community as a fixed effect, age at baseline, sex, ethnicity, race, gas stove in home, participation in sports, and community-level average temperature for baseline year.                                 |      |         |                   |         |                   |         |
| Model for PM <sub>2.5</sub> adjusting for PM <sub>10</sub> was not included because Pearson partial correlation coefficient, controlling for community, was 0.83.                                                              |      |         |                   |         |                   |         |

**eTable 4. Results of Sensitivity Analyses Using Cox Proportional Hazards Models for Ozone (O<sub>3</sub>), Nitrogen Dioxide (NO<sub>2</sub>), Particulate Matter <10 μm (PM<sub>10</sub>) and <2.5 μm (PM<sub>2.5</sub>) in the Children's Health Study, 1993-2014**

| Model                                                                                                                                                                                                                                                                                                    | O <sub>3</sub>    |         | NO <sub>2</sub>   |         | PM <sub>10</sub>  |         | PM <sub>2.5</sub> |         |
|----------------------------------------------------------------------------------------------------------------------------------------------------------------------------------------------------------------------------------------------------------------------------------------------------------|-------------------|---------|-------------------|---------|-------------------|---------|-------------------|---------|
|                                                                                                                                                                                                                                                                                                          | HR (95% CI)       | P value |
| Main Cox PH model                                                                                                                                                                                                                                                                                        | 0.85 (0.71, 1.01) | 0.07    | 0.80 (0.71, 0.90) | <0.001  | 0.94 (0.83, 1.06) | 0.29    | 0.81 (0.66, 0.98) | 0.03    |
| Main model with spline for calendar year                                                                                                                                                                                                                                                                 | 1.00 (0.78, 1.28) | 0.99    | 0.82 (0.69, 0.97) | 0.02    | 1.02 (0.89, 1.17) | 0.78    | 1.28 (0.90, 1.83) | 0.17    |
| Main model with time-varying exposure                                                                                                                                                                                                                                                                    | 0.92 (0.75, 1.12) | 0.41    | 0.87 (0.80, 0.94) | <0.001  | 0.97 (0.90, 1.03) | 0.33    | 0.83 (0.70, 0.99) | 0.04    |
| Hazards rate ratios (HR) are per -8.9 ppb for O <sub>3</sub> ; -4.3 ppb for NO <sub>2</sub> ; -4.0 μg/m <sup>3</sup> for PM <sub>10</sub> ; and -8.1 μg/m <sup>3</sup> for PM <sub>2.5</sub> (median changes in air pollution concentrations observed among the nine communities between 1993 and 2006). |                   |         |                   |         |                   |         |                   |         |
| Models adjusted for community as a fixed effect, age at baseline, sex, ethnicity, race, gas stove in home, participation in sports, and community-level average temperature for baseline year. Random effect for cohort nested within community not included.                                            |                   |         |                   |         |                   |         |                   |         |
| Time-varying exposure were 1-year lagged annual mean air pollutant concentration                                                                                                                                                                                                                         |                   |         |                   |         |                   |         |                   |         |

## eReferences

1. Berhane K, Gauderman WJ, Stram DO, Thomas DC. Statistical issues in studies of the long-term effects of air pollution: The Southern California Children's Health Study. *Stat Sci*. 2004;19(3):414-434.
2. Berhane K, Chang CC, McConnell R, et al. Association of Changes in Air Quality With Bronchitic Symptoms in Children in California, 1993-2012. *JAMA*. 2016;315(14):1491-1501.
3. Gauderman WJ, Urman R, Avol E, et al. Association of improved air quality with lung development in children. *N Engl J Med*. 2015;372(10):905-913.
4. Loomis D, Richardson DB, Elliott L. Poisson regression analysis of ungrouped data. *Occup Environ Med*. 2005;62(5):325-329.
